# Supplementary material
Source: Elsevier journal article supplement (https://www.sciencedirect.com/science/article/pii/S2238785418304708)
Supplement: mmc1 [file S2238785418304708:mmc1.docx]

Figure SM1. Evolution of the plastic range with oxidation time at 50 ºC under conditions of 20/90% rh and an air atmosphere.

Figure SM2. Relationship between the Gieseler maximum fluidity of the fresh coals and their oxidised samples under conditions of 20/90 % rh and the microstrength index R3 (%) for the resultant cokes.
